# Supplementary material
Source: publisher site journal article supplement (https://www.degruyterbrill.com/publication/isbn/9783866537316/downloadAsset/9783866537316_Contents.pdf)
Supplement: Supplementary file 1 [file 9783866537316_Contents.pdf]

The Interaction of  
Contract Law and Tort and  
Property Law in Europe



# The Interaction of Contract Law and Tort and Property Law in Europe

A Comparative Study

Professor Dr. Dr. h.c. Christian von Bar, FBA

Director of the University of Osnabrück

Professor Dr. Dr. h.c. mult. Ulrich Drobnig

Emeritus Director of the Max Planck Institute for Foreign and  
Private International Law, Hamburg

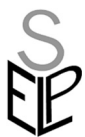

Sellier. European Law Publishers



**In collaboration with**

Professor Dr. Guido Alpa (Rome), Professor Dr. John Blackie (Strathclyde), Professor Dr. Mauro Bussani (Trieste), Professor Dr. Carlo Castronovo (Milan), Professor Dr. Antonio Gambaro (Milan), Professor Dr. Viggo Hagstrøm (Oslo), Professor Dr. Michael Rainer (Salzburg), Professor Dr. Christina Ramberg (Gothenburg), Dr. Stephen Swann (Osnabrück) and Dr. Robert Wintgen (Paris)

**members of the Osnabrück Research Team of the Study Group  
on a European Civil Code**

Begoña Alfonso de la Riva (Spain), Dr. Erwin Beysen (Belgium, France), Dr. Evlalia Eleftheriadou (Greece), Andreas Fötschl (Austria), Caterina Gozzi (Italy), Dr. Matthias Hünert (Germany), Ina El Kobbia (Organisation and evaluation of empirical information), Rosalie Koolhoven (The Netherlands), Stephen Love (Translation), José Carlos de Medeiros Nóbrega (Portugal), Sandra Rohlfing (Private International Law) and Johan Sandstedt (Nordic Countries)

**and with the assistance of**

Dr. Georges Affaki (Paris), Professor Michael Bridge (London), Professor Ángel Carrasco (Toledo), Professor Philippe Delebecque (Paris), Professor Eric Dirix (Leuven), Professor G. Graf (Salzburg), Professor George Gretton (Edinburgh), Professor Torgny Håstad (Stockholm), Professor Bent Iversen (Odense), Professor Y. Karibali-Tsiptsiou (Athens), Professor Markus Lukas (Linz), Professor R. Paisley (Aberdeen), Professor Encarna Roca y Trias (Barcelona), Dr. Jacobien Rutgers (Amsterdam), Professor Henk J. Snijders (Leiden), Professor Tammi-Salminen (Turku), Professor C. van der Merwe (Aberdeen), Professor Anna Veneziano (Rome), and Dr. Hans Wolfsteiner (Munich).

ISBN 3-935808-20-8

Die Deutsche Bibliothek verzeichnet diese Publikation in der Deutschen Nationalbibliografie; detaillierte bibliografische Daten sind im Internet über <http://dnb.ddb.de> abrufbar.

© 2004 by Sellier. European Law Publishers GmbH, München.

Dieses Werk einschließlich aller seiner Teile ist urheberrechtlich geschützt. Jede Verwertung außerhalb der engen Grenzen des Urheberrechtsgesetzes ist ohne Zustimmung des Verlages unzulässig und strafbar. Das gilt insbesondere für Vervielfältigungen, Übersetzungen, Mikroverfilmungen und die Einspeicherung und Verarbeitung in elektronischen Systemen.

Gestaltung: Sandra Sellier, München. Herstellung: Karina Hack, München.  
Satz: Federer & Krauß GmbH, Augsburg. Druck und Bindung: Pustet, Regensburg.  
Gedruckt auf säurefreiem, alterungsbeständigem Papier. Printed in Germany

## Preface

This book is the collective work of jurists from fifteen European jurisdictions. It was completed under our coordination in nine months of intensive cooperative labour. Its purpose is to promote informed opinion and advance the process of policy formation with regard to the substantive scope of the Common Frame of Reference desired by the European Commission and the European Parliament. This Common Frame of Reference will in turn have the potential to play a large and perhaps prominent role in efforts towards addressing the problems created by divergence of the aspects of private law relevant to the internal market. Before any such measures can be contemplated, a discussion must in our view be initiated as to whether such an unprecedented instrument should be confined to contract law or extended to the neighbouring areas of the law of obligations and property law. In order to probe the border areas between contract and tort law and between contract and property law and their impact on the internal market, the European Commission commissioned this Study. We present the results of that work in this book publication for the wider benefit of experts and interested parties. We do so in the light of experience that scholarly legal analyses which are only published in the internet usually obtain a limited readership. Our Study appears under the imprint of Sellier. European Law Publishers, who will also be publishing the results of the work of the Study Group on a European Civil Code.

We are grateful for the permission of the European Commission, for whom this Study was undertaken, allowing us to publish the Study in book form. In accordance with the Commission's request, we explicitly acknowledge the Commission's rights (copyrights and others) in the Study. It was submitted to the Health and Consumer Protection Directorate General (SANCO B5-1000/02/000574) as a draft final report on 23 February 2004 in return for an overall contract sum of € 225,000. The opinions expressed in this Study are those of its authors and do not represent the Commission's position. This publication is freely accessible on the Commission's webpage under [http://europa.eu.int/comm/consumers/cons\\_int/safe\\_shop/fair\\_bus\\_pract/cont\\_law/index\\_en.htm](http://europa.eu.int/comm/consumers/cons_int/safe_shop/fair_bus_pract/cont_law/index_en.htm)

Osnabrück and Hamburg, May 2004

*Christian v. Bar  
Ulrich Drobnig*





## Table of Contents

|                                                                           |           |
|---------------------------------------------------------------------------|-----------|
| Preface                                                                   | VII       |
| Introduction                                                              | 1         |
| <b>I. The Background</b>                                                  | <b>1</b>  |
| 1. The subject of this study                                              | 1         |
| 2. The Council meeting in Tampere and the Communication of the Commission | 1         |
| 3. Reactions                                                              | 2         |
| 4. The Justice and Home Affairs Council                                   | 2         |
| 5. The approach of the European Parliament                                | 3         |
| 6. The Economic and Social Committee                                      | 4         |
| 7. The European Commission's Green Paper on the Rome Convention           | 4         |
| 8. Principles as applicable law?                                          | 5         |
| 9. The Commission's Action Plan                                           | 6         |
| 10. Sixth Framework Programme on Research                                 | 6         |
| 11. Study on product liability                                            | 7         |
| 12. Study on consumer legislation                                         | 7         |
| 13. Strategy document                                                     | 8         |
| 14. Consumer Policy Strategy 2002-2006                                    | 8         |
| 15. Information campaign                                                  | 8         |
| 16. Rome II                                                               | 8         |
| 17. Working group on mortgage loans                                       | 10        |
| <b>II. The Problems</b>                                                   | <b>10</b> |
| 18. Initial considerations for this study                                 | 10        |
| 19. Absence of a uniform concept of contract law                          | 11        |
| 20. The structure of the interference problem                             | 12        |
| 21. Examples in the relationship of tort law to contract law              | 13        |
| 22. Peculiarities of tort law                                             | 14        |
| 23. Further aspects of the interference problem                           | 15        |
| 24. The passing on of information                                         | 16        |
| 25. Determining who is liable                                             | 16        |
| 26. Economic contexts                                                     | 17        |
| 27. Examples in the relationship of property law to contract law          | 17        |
| 28. Examples in the relationship of trust law to contract law             | 18        |

|             |                                                                                                                                  |           |
|-------------|----------------------------------------------------------------------------------------------------------------------------------|-----------|
| 29.         | The interference problem and its relation to obstacles to the exploitation of the internal market and distortions of competition | 19        |
| 30.         | A broader understanding of the term “interference”                                                                               | 20        |
| <b>III.</b> | <b>Methods and Authorship of this Study</b>                                                                                      | <b>21</b> |
| 31.         | Procurement of the legal data                                                                                                    | 21        |
| 32.         | The team of authors                                                                                                              | 21        |
| 33.         | Ditto                                                                                                                            | 21        |
| 34.         | Ditto                                                                                                                            | 22        |
| 35.         | Ditto                                                                                                                            | 22        |
| 36.         | Procurement of the empirical information                                                                                         | 22        |

Part One:

**Non-contractual Liability and Contract Law**

|             |                                                                         |           |
|-------------|-------------------------------------------------------------------------|-----------|
| <b>I.</b>   | <b>Overview of National Approaches to Non-contractual Liability Law</b> | <b>25</b> |
| <b>(1.)</b> | <b>General</b>                                                          | <b>25</b> |
| 37.         | The concept of “non-contractual liability law”                          | 25        |
| 38.         | Definition and purpose of the law of tort (or delict)                   | 25        |
| <b>(2.)</b> | <b>Differences in External Representation</b>                           | <b>26</b> |
| 39.         | Liability based on intention or negligence                              | 26        |
| 40.         | England and Wales, Ireland, Continental Europe, Scandinavia             | 26        |
| 41.         | Systems relying on broad principles                                     | 27        |
| 42.         | Systems relying on a list of protected interests                        | 27        |
| 43.         | The Netherlands                                                         | 28        |
| 44.         | Summary                                                                 | 28        |
| <b>(3.)</b> | <b>Pure Economic Loss</b>                                               | <b>28</b> |
| 45.         | Differences in approach                                                 | 28        |
| 46.         | Different notions of pure economic loss                                 | 29        |
| <b>(4.)</b> | <b>Protection Afforded to Intangible Rights of Personality</b>          | <b>31</b> |
| 47.         | Common Law                                                              | 31        |
| 48.         | Contract Law                                                            | 32        |
| 49.         | Non-contractual liability law                                           | 32        |
| 50.         | Greece, Spain, France                                                   | 32        |
| 51.         | Portugal, Germany, Austria                                              | 33        |
| 52.         | Italy                                                                   | 33        |
| 53.         | The Netherlands                                                         | 34        |
| <b>(5.)</b> | <b>Strict Liability</b>                                                 | <b>34</b> |
| 54.         | General                                                                 | 34        |
| 55.         | Narrow systems                                                          | 36        |
| 56.         | Scandinavian Laws                                                       | 36        |

|             |                                                                                          |           |
|-------------|------------------------------------------------------------------------------------------|-----------|
| 57.         | Common Law                                                                               | 37        |
| 58.         | Systems relying on broad principles                                                      | 37        |
| 59.         | Recent French case law                                                                   | 38        |
| 60.         | Gardien liability for persons                                                            | 38        |
| 61.         | Belgium                                                                                  | 39        |
| 62.         | Italy                                                                                    | 39        |
| 63.         | Portugal and the Netherlands                                                             | 40        |
| 64.         | Significance of the differences from the standpoint of the interference problem          | 40        |
| 65.         | Significance of the differences from the standpoint of the internal market               | 42        |
| <b>II.</b>  | <b>The Main Differences between Contractual and Non-contractual Liability for Damage</b> | <b>42</b> |
| 66.         | General                                                                                  | 42        |
| 67.         | The division between contractual and tortious liability to compensate                    | 44        |
| 68.         | Liability for services                                                                   | 44        |
| 69.         | Greece: liability for defective services                                                 | 44        |
| 70.         | France: doctor's and hospital's liability                                                | 45        |
| 71.         | The common ground of contract and tort law                                               | 46        |
| <b>(1.)</b> | <b>Dependence of Liability on Fault</b>                                                  | <b>46</b> |
| <b>(a)</b>  | <b>Tort law</b>                                                                          | <b>46</b> |
| 72.         | Strict liability and negligence based liability                                          | 46        |
| 73.         | Culpa cuasi-objectiva: Spain                                                             | 47        |
| 74.         | Protected interests                                                                      | 50        |
| 75.         | Reversal of the burden of proof: general                                                 | 51        |
| 76.         | Civil law countries: judge-made rules                                                    | 51        |
| 77.         | Common law countries                                                                     | 52        |
| 78.         | Civil law countries: statutory provisions                                                | 52        |
| 79.         | Presumptions of liability                                                                | 53        |
| 80.         | The main areas of application of conventional fault-based liability                      | 53        |
| 81.         | Notion of fault                                                                          | 53        |
| <b>(b)</b>  | <b>Contract law</b>                                                                      | <b>54</b> |
| 82.         | General                                                                                  | 54        |
| 83.         | Belgium, France, Luxembourg: general                                                     | 54        |
| 84.         | Seller's guarantee                                                                       | 55        |
| 85.         | Liability of constructeurs under French law                                              | 56        |
| 86.         | Italy                                                                                    | 57        |
| 87.         | Austria                                                                                  | 58        |
| 88.         | Spain                                                                                    | 60        |
| 89.         | Portugal                                                                                 | 62        |
| 90.         | The Netherlands                                                                          | 63        |
| 91.         | Germany                                                                                  | 64        |
| 92.         | Sweden                                                                                   | 65        |
| 93.         | United Kingdom                                                                           | 66        |

|                                                    |    |
|----------------------------------------------------|----|
| <b>(2.) Damages for Economic Loss</b>              | 68 |
| 94. Overview                                       | 68 |
| 95. Economic and non-economic damage distinguished | 69 |
| <b>(a) Tort law</b>                                | 70 |
| 96. Belgium, France, Luxembourg                    | 70 |
| 97. Italy                                          | 71 |
| 98. Austria, Germany and Sweden                    | 71 |
| 99. Portugal                                       | 72 |
| 100. The Netherlands                               | 72 |
| 101. England and Wales                             | 73 |
| 102. Scotland                                      | 73 |
| <b>(b) Contract law</b>                            | 75 |
| 103. General                                       | 75 |
| 104. France and Belgium                            | 75 |
| 105. Italy                                         | 76 |
| 106. Spain                                         | 76 |
| 107. Portugal                                      | 77 |
| 108. Germany, Greece, Austria                      | 77 |
| 109. Sweden                                        | 78 |
| 110. England and Wales                             | 79 |
| 111. Scotland                                      | 80 |
| 112. Remoteness and causation                      | 81 |
| <b>(3.) Loss of Chance</b>                         | 83 |
| 113. Loss of chance: general                       | 83 |
| 114. France, Belgium and Luxembourg                | 84 |
| 115. Italy and Austria                             | 84 |
| 116. Spain                                         | 85 |
| 117. Portugal                                      | 85 |
| 118. Sweden                                        | 86 |
| 119. United Kingdom                                | 86 |
| <b>(4.) Damages for Non-economic Loss</b>          | 89 |
| <b>(a) Tort law</b>                                | 89 |
| 120. Two basic models                              | 89 |
| 121. Belgium, France, Luxembourg, Spain            | 89 |
| 122. Portugal                                      | 90 |
| 123. Germany                                       | 91 |
| 124. Greece                                        | 91 |
| 125. Italy                                         | 92 |
| 126. The Netherlands                               | 93 |
| 127. Austria                                       | 94 |
| 128. Scandinavia                                   | 94 |
| 129. United Kingdom                                | 95 |

|                                                                                     |     |
|-------------------------------------------------------------------------------------|-----|
| <b>(b) Contract law</b>                                                             | 98  |
| 130. Basic situations                                                               | 98  |
| 131. Obstacles to the smooth running of the internal market                         | 98  |
| 132. The package travel directive                                                   | 99  |
| 133. National implementation                                                        | 100 |
| 134. Discrimination in employment law                                               | 101 |
| 135. National implementation                                                        | 102 |
| 136. Sweden                                                                         | 102 |
| 137. Austria                                                                        | 103 |
| 138. The autonomous contract law of the member states                               | 103 |
| 139. Belgium and France                                                             | 104 |
| 140. Spain                                                                          | 104 |
| 141. United Kingdom                                                                 | 105 |
| 142. Germany                                                                        | 106 |
| 143. Sweden                                                                         | 107 |
| 144. Austria                                                                        | 107 |
| 145. Italy                                                                          | 107 |
| 146. Greece                                                                         | 108 |
| 147. Portugal                                                                       | 109 |
| <br><b>(5.) Aggravated and Exemplary (or Punitive) Damages</b>                      | 109 |
| 148. Definition                                                                     | 109 |
| 149. Contract and tort law                                                          | 110 |
| 150. Breadth of application                                                         | 111 |
| 151. Common Law                                                                     | 111 |
| 152. France and Belgium                                                             | 113 |
| 153. Astreinte                                                                      | 114 |
| 154. Portugal                                                                       | 114 |
| 155. Italy                                                                          | 115 |
| 156. Spain                                                                          | 115 |
| 157. Austria                                                                        | 115 |
| 158. Greece                                                                         | 116 |
| 159. Germany                                                                        | 117 |
| 160. Scandinavia                                                                    | 118 |
| <br><b>(6.) Recovery of Pure Economic Loss</b>                                      | 118 |
| 161. Introduction                                                                   | 118 |
| 162. No universal definition                                                        | 119 |
| 163. Pure versus consequential economic loss                                        | 119 |
| 164. An artificial distinction?                                                     | 119 |
| 165. Actor's state of mind: intention versus negligence                             | 120 |
| 166. Ricochet loss                                                                  | 121 |
| 167. Transferred loss                                                               | 121 |
| 168. Closure of public markets, transportation corridors and public infrastructures | 122 |
| 169. Reliance upon flawed data, advice or professional services                     | 123 |
| 170. Present versus future loss                                                     | 123 |

|                                                |     |
|------------------------------------------------|-----|
| 171. A challenge to traditional views          | 124 |
| 172. Basic arguments for the exclusionary rule | 124 |
| 173. The 'floodgates' argument                 | 124 |
| 174. Scale of human values                     | 124 |
| 175. Historical perspective                    | 125 |
| 176. Liberal regimes                           | 125 |
| 177. Pragmatic regimes                         | 126 |
| 178. Conservative regimes                      | 126 |
| 179. France                                    | 126 |
| 180. Belgium                                   | 127 |
| 181. Italy                                     | 128 |
| 182. Spain                                     | 128 |
| 183. Greece                                    | 129 |
| 184. England and Wales                         | 130 |
| 185. The Netherlands                           | 131 |
| 186. Germany                                   | 131 |
| 187. Contract and tort                         | 132 |
| 188. Austria                                   | 133 |
| 189. Tort law                                  | 133 |
| 190. Contract law                              | 133 |
| 191. Portugal                                  | 134 |
| 192. Sweden                                    | 135 |
| 193. Interim conclusions                       | 136 |
| 194. Absence of methodological common core     | 136 |
| 195. The time factor                           | 137 |
| 196. The substantive common core               | 137 |
| 197. Consequential loss                        | 137 |
| 198. International harm                        | 137 |
| 199. Key areas of negligence-based protection  | 138 |
| 200. Contract, tort and property law           | 138 |
| <br>(7.) Employer's Liability                  | 138 |
| (a) Tort law                                   | 138 |
| 201. General                                   | 138 |
| 202. France and Belgium                        | 139 |
| 203. Italy                                     | 140 |
| 204. Greece                                    | 140 |
| 205. Portugal                                  | 141 |
| 206. Germany                                   | 141 |
| 207. Spain                                     | 142 |
| 208. Austria                                   | 143 |
| 209. Sweden                                    | 144 |
| 210. United Kingdom                            | 144 |
| <br>(b) Contract law                           | 148 |
| 211. France and Belgium                        | 148 |

|                                                                     |            |
|---------------------------------------------------------------------|------------|
| 212. Italy and Germany                                              | 149        |
| 213. Spain                                                          | 149        |
| 214. Portugal                                                       | 149        |
| 215. Greece                                                         | 150        |
| 216. Austria                                                        | 150        |
| 217. Sweden                                                         | 151        |
| 218. United Kingdom                                                 | 151        |
| <b>(8.) Reduction or Exclusion of Liability</b>                     | <b>152</b> |
| 219. Introduction                                                   | 152        |
| <b>(a) Tort law</b>                                                 | <b>153</b> |
| 220. Statutory clauses enabling reduction of liability              | 153        |
| 221. Spain                                                          | 153        |
| 222. Portugal                                                       | 153        |
| 223. The Netherlands                                                | 154        |
| 224. Sweden                                                         | 154        |
| 225. Contractual restrictions of tortious liability                 | 155        |
| 226. France and Belgium                                             | 155        |
| 227. Austria                                                        | 155        |
| 228. Italy                                                          | 156        |
| 229. Spain                                                          | 156        |
| 230. Portugal                                                       | 157        |
| 231. Germany                                                        | 157        |
| 232. United Kingdom                                                 | 158        |
| <b>(b) Contract Law</b>                                             | <b>160</b> |
| 233. Statutory and contractual limitations of contractual liability | 160        |
| 234. PECL                                                           | 161        |
| 235. France and Belgium                                             | 161        |
| 236. Spain                                                          | 162        |
| 237. Portugal                                                       | 162        |
| 238. Germany                                                        | 163        |
| 239. Austria                                                        | 163        |
| 240. Italy and The Netherlands                                      | 164        |
| 241. United Kingdom                                                 | 164        |
| 242. The internal market                                            | 167        |
| <b>(9.) Contributory Negligence (or Fault)</b>                      | <b>168</b> |
| 243. Germany and Portugal                                           | 168        |
| <b>(a) Tort law</b>                                                 | <b>169</b> |
| 244. France and Belgium                                             | 169        |
| 245. Italy                                                          | 169        |
| 246. Spain                                                          | 170        |
| 247. Austria                                                        | 170        |

|                                                             |            |
|-------------------------------------------------------------|------------|
| 248. The Netherlands                                        | 171        |
| 249. Sweden                                                 | 171        |
| 250. United Kingdom                                         | 171        |
| <b>(b) Contract law</b>                                     | <b>174</b> |
| 251. France and Belgium                                     | 174        |
| 252. Italy                                                  | 174        |
| 253. Spain                                                  | 174        |
| 254. Austria                                                | 175        |
| 255. Sweden                                                 | 175        |
| 256. United Kingdom                                         | 176        |
| <b>(10.) Prescription</b>                                   | <b>178</b> |
| 257. General                                                | 178        |
| 258. Austria                                                | 178        |
| 259. The Netherlands                                        | 179        |
| 260. Sweden                                                 | 179        |
| 261. United Kingdom                                         | 180        |
| 262. England and Wales                                      | 180        |
| 263. Contract law                                           | 180        |
| 264. Tort law                                               | 180        |
| 265. Criticisms                                             | 181        |
| 266. Scotland                                               | 181        |
| 267. Personal injury actions                                | 182        |
| <b>(a) Tort law</b>                                         | <b>229</b> |
| 268. France and Belgium                                     | 231        |
| 269. Italy                                                  | 231        |
| 270. Spain                                                  | 232        |
| 271. Portugal                                               | 232        |
| 272. Germany                                                | 233        |
| <b>(b) Contract law</b>                                     | <b>233</b> |
| 273. France and Belgium                                     | 233        |
| 274. Italy                                                  | 234        |
| 275. Spain                                                  | 234        |
| 276. Portugal                                               | 235        |
| 277. Germany                                                | 235        |
| 278. Sweden                                                 | 235        |
| 279. Obstacles to the smooth running of the internal market | 236        |
| <b>III. The Problem of Concurrence of Actions</b>           | <b>236</b> |
| <b>(1.) Overview</b>                                        | <b>237</b> |
| 280. Alternative regimes and areas of overlap               | 237        |
| 281. Priority of contract law?                              | 237        |
| 282. Unity of tort law                                      | 238        |



|                                                                                                                  |                |
|------------------------------------------------------------------------------------------------------------------|----------------|
| <b>(2.) Liability for Bodily Injury and Damage to Property</b>                                                   | <b>239</b>     |
| 283. Core contractual duties                                                                                     | 239            |
| 284. Collateral contractual duties                                                                               | 239            |
| 285. France                                                                                                      | 239            |
| 286. Belgium                                                                                                     | 239            |
| 287. Italy                                                                                                       | 240            |
| 288. Spain                                                                                                       | 240            |
| 289. Germany                                                                                                     | 240            |
| 290. Greece                                                                                                      | 241            |
| 291. Portugal                                                                                                    | 242            |
| 292. Sweden                                                                                                      | 243            |
| 293. United Kingdom                                                                                              | 244            |
| <br><b>(3.) Approaches Adopted</b>                                                                               | <br><b>244</b> |
| 294. Basic concepts                                                                                              | 244            |
| 295. The principle of non-cumul des responsabilités: Belgium and France                                          | 245            |
| 296. Italy                                                                                                       | 246            |
| 297. Spain                                                                                                       | 246            |
| 298. The Netherlands                                                                                             | 248            |
| 299. Germany                                                                                                     | 248            |
| 300. Austria                                                                                                     | 249            |
| 301. Greece                                                                                                      | 249            |
| 302. Portugal                                                                                                    | 249            |
| 303. Sweden                                                                                                      | 249            |
| 304. United Kingdom                                                                                              | 250            |
| <br><b>(4.) In particular: Liability in respect of Self-contained Damage in Defective Products and Buildings</b> | <br><b>250</b> |
| 305. General                                                                                                     | 250            |
| 306. Germany                                                                                                     | 251            |
| 307. Greece                                                                                                      | 251            |
| 308. Italy                                                                                                       | 251            |
| 309. Austria                                                                                                     | 252            |
| 310. Spain                                                                                                       | 252            |
| 311. Portugal                                                                                                    | 252            |
| 312. Belgium, France, Luxembourg                                                                                 | 253            |
| 313. The Netherlands                                                                                             | 253            |
| 314. Sweden                                                                                                      | 254            |
| 315. United Kingdom                                                                                              | 255            |
| <br><b>IV. Interference with Contractual Rights</b>                                                              | <br><b>255</b> |
| 316. Introduction                                                                                                | 256            |
| 317. Groups of cases covered                                                                                     | 256            |
| <br><b>(1.) Third Party Influence on a Contractual Relationship by Unfair Actions</b>                            | <br><b>257</b> |
| 318. Unfair activities                                                                                           | 257            |

|                                                                                                             |         |
|-------------------------------------------------------------------------------------------------------------|---------|
| 319. Key argument in favour of liability                                                                    | 258     |
| 320. Third party liability if the party unduly misleads or causes the debtor to breach a contract           | 258     |
| 321. Misleading information leading to breach of contract                                                   | 259     |
| 322. Firm rules missing                                                                                     | 259     |
| 323. Good business practice                                                                                 | 260     |
| 324. Illustrations                                                                                          | 260     |
| 325. Break-away cases, freedom of action by former employees                                                | 261     |
| 326. Attempts to hire a competitor's employees                                                              | 261     |
| 327. Change of agent or sole distributor                                                                    | 262     |
| 328. Attempts to take over others' clients                                                                  | 262     |
| <br>(2.) Loss of Business as a Result of the Co-contractor's Exposure to Material Damage or Personal Injury | <br>263 |
| 329. General                                                                                                | 263     |
| 330. Damage to property                                                                                     | 267     |
| 331. Entitlement to claim damages                                                                           | 269     |
| 332. Limitation mechanisms                                                                                  | 273     |
| 333. Groups of cases                                                                                        | 273     |
| 334. Damage to an item of the debtor in which the creditor has a direct interest                            | 274     |
| 335. "Obligatory" rights                                                                                    | 274     |
| 336. Common Law                                                                                             | 275     |
| 337. Other jurisdictions                                                                                    | 275     |
| 338. Direct damage to the creditor                                                                          | 275     |
| 339. Employment contracts                                                                                   | 276     |
| 340. Personal injury to an employee                                                                         | 276     |
| 341. Injury to debtors other than employees                                                                 | 276     |
| 342. Material damage to tools or equipment necessary for the injured party's performance to the creditor    | 277     |
| <br>V. Liability Issues in Specific Contexts                                                                | <br>277 |
| (1.) Pre-contractual Liability                                                                              | 277     |
| 343. Introduction                                                                                           | 278     |
| 344. Germany                                                                                                | 278     |
| 345. Groups of cases                                                                                        | 278     |
| 346. Greece                                                                                                 | 280     |
| 347. Italy                                                                                                  | 280     |
| 348. Portugal                                                                                               | 283     |
| 349. Spain                                                                                                  | 283     |
| 350. Austria                                                                                                | 283     |
| 351. France, Belgium, Luxemburg                                                                             | 283     |
| 352. Sweden                                                                                                 | 287     |
| 353. England                                                                                                | 289     |
| 354. Common Law                                                                                             | 292     |
| 355. Equity                                                                                                 | 295     |
| 356. Scotland                                                                                               | 229     |

|                                                                                      |     |
|--------------------------------------------------------------------------------------|-----|
| <b>(2.) Consumer Protection</b>                                                      | 231 |
| 357. General                                                                         | 231 |
| 358. Sale of consumer goods                                                          | 232 |
| 359. Promises of winnings: France                                                    | 232 |
| <b>(3.) Product Liability</b>                                                        | 233 |
| <b>(a) Scope and limits of EU legislation</b>                                        | 233 |
| 360. Uniform European regime of product liability still missing                      | 233 |
| <b>(b) Liability of producer and seller</b>                                          | 234 |
| 361. Privity of contract                                                             | 234 |
| 362. Germany                                                                         | 235 |
| 363. Italy                                                                           | 235 |
| 364. Greece                                                                          | 235 |
| 365. France                                                                          | 236 |
| 366. Contract law                                                                    | 236 |
| 367. Austria                                                                         | 237 |
| <b>(4.) Defective Services</b>                                                       | 237 |
| 368. The failure of the proposal for a directive                                     | 237 |
| 369. Greece                                                                          | 238 |
| <b>(5.) Liability for Misinformation</b>                                             | 239 |
| <b>(a) Italian system</b>                                                            | 239 |
| <b>(i) Misinformation</b>                                                            | 239 |
| 370. The notion of information                                                       | 239 |
| 371. Duties to inform                                                                | 239 |
| 372. The information marketplace                                                     | 240 |
| 373. The legal framework in Italian law                                              | 240 |
| 374. Inaccurate information and reputation                                           | 240 |
| 375. Economic reputation                                                             | 241 |
| 376. Technical and scientific information                                            | 242 |
| 377. Commercial information                                                          | 243 |
| 378. Compilation of lists, guides, directories and opinion polls                     | 244 |
| <b>(ii) Information between the parties</b>                                          | 244 |
| 379. Civil liability for communication of inaccurate information between the parties | 244 |
| 380. Information within the scope of the informer's professional business            | 245 |
| 381. Information, civil liability and contractual liability                          | 246 |
| 382. Culpa in contrahendo and duties to inform                                       | 246 |
| 383. Fraud by omission                                                               | 248 |
| 384. Pre-contractual liability and contractual liability                             | 248 |
| <b>(iii) Information in certain particular cases</b>                                 | 249 |
| <b>(aa) Information between doctor and patient</b>                                   | 249 |
| 385. Informed consent                                                                | 249 |

|                                                                                               |            |
|-----------------------------------------------------------------------------------------------|------------|
| 386. The freedom of self determination in relation to medical treatment                       | 249        |
| 387. Personal freedom of the patient; the duty to inform and its limits                       | 250        |
| 388. The nature of the consent                                                                | 250        |
| 389. The purpose of medical information                                                       | 250        |
| 390. Liability for breach of the medical duty to inform                                       | 251        |
| 391. The chain of causation                                                                   | 251        |
| 392. Medical information and culpa in contrahendo                                             | 251        |
| 393. The burden of proof                                                                      | 252        |
| <b>(bb) Information and liability of the producer or retailer: protection of the consumer</b> | <b>252</b> |
| 394. Information and liability of the producer                                                | 252        |
| 395. Notions of product, producer and defect                                                  | 253        |
| 396. The manufacturer's duties to inform                                                      | 253        |
| 397. Improper use of the product and instructions                                             | 254        |
| 398. Instructions, warnings and toys                                                          | 255        |
| 399. Recommended age range for users                                                          | 255        |
| 400. Labels, instructions and warnings                                                        | 256        |
| 401. Products dangerous for children                                                          | 256        |
| 402. The package travel directive (Directive 90/314/EEC)                                      | 257        |
| 403. The doorstep selling directive (Directive 85/577/EEC)                                    | 257        |
| 404. The consumer credit directive (Directive 87/102/EEC)                                     | 258        |
| 405. The distance selling directive (Directive 97/7/EC)                                       | 258        |
| 406. The timeshare directive (Directive 94/47/EC)                                             | 259        |
| 407. The cross-border credit transfer directive (Directive 97/5/EC)                           | 259        |
| 408. The e-commerce directive (Directive 2000/31/EC)                                          | 260        |
| 409. The third non-life insurance directive (Directive 92/49/EEC)                             | 260        |
| 410. The data protection directive (Directive 95/46/EC)                                       | 261        |
| 411. The commercial agents directive (Directive 86/653/EEC)                                   | 261        |
| 412. The public works contracts directive (Directive 93/37/EEC)                               | 262        |
| 413. The consumer sales directive (Directive 99/44/EC)                                        | 262        |
| <b>(cc) Liability for prospectuses</b>                                                        | <b>263</b> |
| 414. Regulators' liability                                                                    | 263        |
| 415. Takeovers                                                                                | 267        |
| 416. Consumer credit                                                                          | 269        |
| <b>(dd) Advertising</b>                                                                       | <b>273</b> |
| 417. Self-regulation                                                                          | 273        |
| 418. Television advertising                                                                   | 274        |
| 419. The Community Directive on misleading advertising                                        | 274        |
| 420. Implementation of the Directive                                                          | 275        |
| 421. Comparative advertising                                                                  | 275        |
| 422. The European Community policy on comparative advertising                                 | 275        |
| 423. Definition                                                                               | 276        |
| 424. Limitations                                                                              | 276        |
| 425. Remedies                                                                                 | 276        |

|                                                                                                          |     |
|----------------------------------------------------------------------------------------------------------|-----|
| (b) English system                                                                                       | 277 |
| (i) Misinformation                                                                                       | 277 |
| 426. Misinformation in the common law                                                                    | 277 |
| (ii) Information in certain particular cases                                                             | 278 |
| (aa) Information between doctor and patient                                                              | 278 |
| 427. The law of consent to medical treatment and doctor's liability for misinformation                   | 278 |
| (bb) Information and liability of the producer or retailer: protection of the consumer                   | 280 |
| 428. Sale of goods and liability for misinformation (quality and fitness for purpose); product liability | 280 |
| 429. The Consumer Protection (Distance Selling) Regulations 2000                                         | 283 |
| 430. The Sale and Supply of Goods to Consumers Regulations 2002                                          | 283 |
| (cc) Liability for prospectuses                                                                          | 283 |
| 431. Regulation of prospectuses and listing particulars                                                  | 283 |
| 432. Auditors' liability                                                                                 | 287 |
| 433. Regulators' liability                                                                               | 289 |
| 434. Takeovers                                                                                           | 292 |
| 435. Consumer credit                                                                                     | 295 |
| (dd) Advertising                                                                                         | 298 |
| 436. Misleading advertising                                                                              | 298 |
| (c) German system                                                                                        | 300 |
| (i) Information between the parties                                                                      | 300 |
| 437. The origins and nature of culpa in contrahendo                                                      | 300 |
| 438. Examples of pre-contractual liability                                                               | 301 |
| 439. False information supplied by a third party                                                         | 301 |
| 440. Duty of care                                                                                        | 301 |
| 441. Culpa in contrahendo after reform of the law of obligations                                         | 302 |
| (ii) Information and liability of the producer or retailer: protection of the consumer                   | 303 |
| 442. The duty to inform in consumer contracts                                                            | 303 |
| 443. Distance contracts                                                                                  | 303 |
| 444. Contracts concluded electronically                                                                  | 304 |
| 445. Timeshare contracts                                                                                 | 304 |
| 446. Consumer credit contracts                                                                           | 304 |
| 447. Standard contract terms                                                                             | 305 |
| VI. Terminological Differences between Contract and Tort Law                                             | 305 |
| 448. Terminological differences within the same legal system                                             | 305 |
| 449. Translation problems                                                                                | 306 |
| 450. Misunderstandings                                                                                   | 306 |
| 451. "Non-contractual liability"                                                                         | 307 |

|                                                                                                                           |     |
|---------------------------------------------------------------------------------------------------------------------------|-----|
| 452. Law of obligations                                                                                                   | 307 |
| 453. Drafting European legislative texts                                                                                  | 308 |
| 454. European Community law                                                                                               | 308 |
| 455. Damage and Schaden                                                                                                   | 308 |
| 456. Damages                                                                                                              | 309 |
| 457. Fault                                                                                                                | 310 |
| <b>VII. Private International Law</b>                                                                                     | 310 |
| 458. Introduction                                                                                                         | 310 |
| <b>(1.) The Ancillary Relationship of Tort Law to Contract Law</b>                                                        | 310 |
| 459. Priority over the <i>lex loci delicti commissi</i>                                                                   | 310 |
| 460. Germany                                                                                                              | 311 |
| 461. Austria                                                                                                              | 311 |
| 462. France                                                                                                               | 312 |
| 463. United Kingdom                                                                                                       | 312 |
| <b>(2.) Problematic Issues of Characterisation</b>                                                                        | 313 |
| 464. General                                                                                                              | 313 |
| 465. Examples from the case law of the ECJ                                                                                | 313 |
| <b>(3.) Bad Faith Proceedings and Antisuit Injunctions</b>                                                                | 314 |
| 466. Tort law versus contract law                                                                                         | 314 |
| <br>Part Two:                                                                                                             |     |
| <b>Property Law and Contract Law</b>                                                                                      |     |
| <b>I. Scope of This Part</b>                                                                                              | 317 |
| <b>(1.) Law of Things or Property Law?</b>                                                                                | 317 |
| 467. Identifying the subject matter                                                                                       | 317 |
| 468. Narrow concepts of “thing”: Germany and Greece                                                                       | 317 |
| 469. Broad concepts of “thing”: Portugal, Italy, Austria, France, Belgium, Spain, Sweden, Scotland, and England and Wales | 317 |
| 470. Broad concept of “assets”: the Netherlands                                                                           | 319 |
| 471. Conclusion                                                                                                           | 320 |
| <b>(2.) Characteristics of Property Law as Distinct from Contract Law</b>                                                 | 320 |
| 472. Introductory remark                                                                                                  | 320 |
| 473. Is there a mandatory <i>numerus clausus</i> of property rights?                                                      | 320 |
| 474. <i>Numerus clausus</i> of property rights and freedom of contract                                                    | 322 |
| 475. Universal effects of proprietary rights                                                                              | 322 |
| 476. Universal effects of property rights and contract law                                                                | 323 |
| <b>(3.) Restriction to Contractual Property Rights</b>                                                                    | 323 |
| 477. General                                                                                                              | 323 |

|                                                                                         |            |
|-----------------------------------------------------------------------------------------|------------|
| <b>(4.) The Qualification of Contractual Rights for Use of an Asset</b>                 | <b>323</b> |
| 478. Hire and leaseholds                                                                | 323        |
| <b>II. Contract Law and Transfer of Title in Movables</b>                               | <b>324</b> |
| <b>(1.) Importance of the Issue</b>                                                     | <b>324</b> |
| 479. The issue                                                                          | 324        |
| 480. Restriction to the contract of sale                                                | 325        |
| <b>(2.) Two Approaches to Transfer of Title</b>                                         | <b>325</b> |
| 481. The unitary approach                                                               | 325        |
| 482. The split approach                                                                 | 325        |
| 483. Vacillating concepts: Austria                                                      | 326        |
| <b>(3.) The Blurring of the Difference between the Two Approaches</b>                   | <b>327</b> |
| 484. Unitary approach                                                                   | 327        |
| 485. Split approach                                                                     | 327        |
| 486. Historical reasons for rigid adherence to principle in continental legal reasoning | 327        |
| 487. Conclusion                                                                         | 328        |
| <b>(4.) The Passing of Risk</b>                                                         | <b>329</b> |
| 488. Introduction                                                                       | 329        |
| 489. Unitary approach                                                                   | 329        |
| 490. Split approach                                                                     | 329        |
| 491. Conclusion                                                                         | 329        |
| <b>(5.) Voidness and Termination of the Contract</b>                                    | <b>330</b> |
| 492. Introduction                                                                       | 330        |
| 493. Unitary approach                                                                   | 330        |
| 494. Split approach                                                                     | 330        |
| 495. Conclusion                                                                         | 331        |
| <b>(6.) Passing of Risk upon Termination of Contract</b>                                | <b>331</b> |
| 496. Introduction                                                                       | 331        |
| 497. Unitary approach                                                                   | 331        |
| 498. Split approach                                                                     | 331        |
| 499. Conclusion                                                                         | 331        |
| <b>(7.) General Conclusion</b>                                                          | <b>331</b> |
| 500. Comprehensive importance of unitary/split approach                                 | 331        |
| <b>III. Contractual Security Rights in Movables and Contract Law</b>                    | <b>332</b> |
| <b>(1.) Introduction</b>                                                                | <b>332</b> |
| 501. Survey                                                                             | 332        |
| 502. Security rights and functional equivalents                                         | 332        |
| 503. Relevance of contracts for security rights: two basic patterns                     | 333        |
| 504. The unitary approach                                                               | 333        |

|                                                                                                     |     |
|-----------------------------------------------------------------------------------------------------|-----|
| 505. The split approach                                                                             | 334 |
| 506. The “real” contract under the split approach                                                   | 334 |
| <b>(2.) Creation of Security Rights</b>                                                             | 335 |
| 507. Relevance of general principles                                                                | 335 |
| 508. Emphasis on contractual elements                                                               | 335 |
| 509. Two functions of contract for creation of contractual security rights                          | 336 |
| 510. The security agreement                                                                         | 336 |
| 511. Contractual elements in the creation of security rights proper: a note on the historical trend | 336 |
| 512. The present role of contract in the creation of security rights: the general rule              | 337 |
| 513. Exceptional creation of security rights only by contract: genuine security rights              | 337 |
| 514. Creation of contractual functional security rights                                             | 338 |
| 515. Retention of title                                                                             | 338 |
| 516. Financial leasing                                                                              | 338 |
| 517. Security assignment of monetary claims (accounts)                                              | 339 |
| <b>(3.) Impact of Invalidity of Security Agreement on the Security</b>                              | 339 |
| 518. Introduction                                                                                   | 339 |
| 519. Effects between the parties                                                                    | 340 |
| 520. Effects of invalidity vis-à-vis third parties                                                  | 340 |
| <b>(4.) Dependence of the Security on the Secured Claim</b>                                         | 341 |
| 521. The principle of dependence: a security right is only accessory to the secured claim           | 341 |
| 522. Erosions of and exceptions to the principle of dependence                                      | 341 |
| 523. Conclusion                                                                                     | 342 |
| <b>(5.) Intra-European Cross Border Problems</b>                                                    | 342 |
| 524. Introduction                                                                                   | 342 |
| 525. Recognition and non-recognition of security rights created in other member states              | 342 |
| 526. Conclusions and reactions of stakeholders                                                      | 347 |
| 527. Securing credit on assets located in another member state                                      | 348 |
| 528. Security rights in border-crossing transactions                                                | 348 |
| 529. Shareholders’ ideas for remedying the present difficulties                                     | 349 |
| <b>IV. Contractual Security Rights in Immovables (Mortgages) and Contract Law</b>                   | 349 |
| <b>(1.) Creation of Mortgages</b>                                                                   | 349 |
| 530. Creditor’s participation in the contract to create a mortgage                                  | 349 |
| 531. Effects of the contract to create a mortgage                                                   | 349 |
| 532. Two systems of creation                                                                        | 350 |
| 533. The English system                                                                             | 351 |
| <b>(2.) Does the Invalidity of the Agreement Affect the Mortgage?</b>                               | 351 |
| 534. Invalidating effects between the parties                                                       | 351 |
| 535. No invalidating effect between the parties                                                     | 352 |



|                                                                                           |     |
|-------------------------------------------------------------------------------------------|-----|
| 536. Effects in relation to third parties                                                 | 352 |
| 537. The special situation under German law                                               | 353 |
| 538. Similar solutions in Sweden and Finland                                              | 354 |
| <b>(3.) Dependence of the Security on the Secured Claim</b>                               | 354 |
| 539. The principle of dependence: a security right is only accessory to the secured claim | 354 |
| 540. Erosion of the principle of dependence                                               | 354 |
| 541. Dependence and transfer of secured claim or mortgage                                 | 355 |
| 542. Dependence and transfer of mortgage document                                         | 356 |
| <b>(4.) Scope of Freedom of Contract</b>                                                  | 356 |
| 543. Various meanings of freedom of contract                                              | 356 |
| <b>(5.) Effect of Debtor's Performance on the Security</b>                                | 357 |
| 544. The effect of dependence: the principle                                              | 357 |
| 545. Exceptions                                                                           | 358 |
| <b>(6.) Enforcement of Security</b>                                                       | 358 |
| 546. General rule: judicial procedure                                                     | 358 |
| 547. Contractual elements in enforcement                                                  | 358 |
| <b>(7.) Intra-European Cross-border Problems</b>                                          | 359 |
| 548. Volume of cross-border secured lending                                               | 359 |
| 549. Present legal conditions                                                             | 360 |
| 550. Experiences of member states with diverse legal systems                              | 360 |
| 551. Lessons from the British experience                                                  | 361 |
| 552. "Natural" impediments                                                                | 361 |
| <b>V. Trust Law</b>                                                                       | 363 |
| <b>(1.) Introduction</b>                                                                  | 363 |
| 553. Focus on the common law trust                                                        | 363 |
| 554. Focus on private trusts and the commercial context                                   | 363 |
| 555. Arrangement of the chapter                                                           | 364 |
| <b>(2.) Nature of the Common Law Trust and its Relationship to Contract Law</b>           | 365 |
| 556. Outline                                                                              | 365 |
| 557. Basic features of the trust                                                          | 365 |
| 558. Significance of classification as contract or trust                                  | 366 |
| 559. Hidden traps                                                                         | 367 |
| <b>(3.) Significance of Trust or Contract for Limitation of Actions</b>                   | 368 |
| 560. General rules                                                                        | 368 |
| 561. Ditto                                                                                | 368 |
| 562. Exceptional cases                                                                    | 369 |

|                                                                                                |            |
|------------------------------------------------------------------------------------------------|------------|
| <b>(4.) Private International Law Difficulties</b>                                             | <b>370</b> |
| 563. General pointers                                                                          | 370        |
| 564. Cross-border trust activities                                                             | 370        |
| 565. Experience from the European Coal and Steel Community                                     | 371        |
| <b>(5.) Trust Law in Conjunction with Contract Law in the Common Law</b>                       | <b>371</b> |
| <b>(a) Interconnections in trust and contract law in outline</b>                               | <b>371</b> |
| 566. Overview                                                                                  | 371        |
| 567. Co-existence of trusts and contracts                                                      | 372        |
| <b>(b) Interconnections in giving credit: the example of the Quistclose trust</b>              | <b>373</b> |
| 568. Trusts of loans for specific purposes: Quistclose trusts                                  | 373        |
| 569. The security effect of Quistclose trusts                                                  | 373        |
| 570. The economic function of Quistclose trusts                                                | 373        |
| <b>(c) Constructive trusts of assets subject to specifically enforceable contracts of sale</b> | <b>374</b> |
| 571. Specifically enforceable contracts of sale                                                | 374        |
| 572. Constructive trust and equitable conversion                                               | 375        |
| 573. Ramifications of conversion: (i) between the contracting parties                          | 376        |
| 574. Ramifications of conversion: (ii) in relation to third parties                            | 376        |
| 575. Promises to transfer after-acquired property                                              | 377        |
| 576. Equitable interest of the promisee                                                        | 378        |
| 577. Security interests                                                                        | 378        |
| <b>(d) Assignment, trusts of contractual rights and third party rights</b>                     | <b>379</b> |
| 578. Voluntary assignment and trusts                                                           | 379        |
| 579. Third party rights to enforce contracts and trusts of contractual rights                  | 380        |
| <b>(e) Trusts and contribution to financing property acquisition</b>                           | <b>381</b> |
| 580. Agreements, contributions and trusts of acquisitions                                      | 381        |
| 581. Relationship to contract rules                                                            | 382        |
| 582. Land and commercial assets                                                                | 382        |
| 583. Loans and contributions                                                                   | 383        |
| <b>(6.) Obstacles to Cross-border Trusteeship of Movable Assets in Common Law Trusts</b>       | <b>383</b> |
| <b>(a) Particular problems in a wider problematic context</b>                                  | <b>383</b> |
| 584. Overview                                                                                  | 383        |
| 585. Express private trusts and statutory trusts                                               | 384        |
| <b>(b) Assistance and intervention of the court</b>                                            | <b>384</b> |
| 586. Position in the common law and Scotland                                                   | 384        |
| 587. 'Self-help' structures in other jurisdictions                                             | 385        |
| <b>(c) Appointment of trustees resident abroad</b>                                             | <b>386</b> |
| 588. Reasons for transfer to trustees abroad                                                   | 386        |
| 589. Common law: basic stance on appointment of foreign trustees                               | 386        |

|                                                                                      |     |
|--------------------------------------------------------------------------------------|-----|
| 590. Necessity for a good reason                                                     | 388 |
| 591. Bias against transfer of jurisdiction                                           | 389 |
| 592. Transfer of jurisdiction in the course of trust variation                       | 391 |
| 593. Similar stance in the law of Scotland                                           | 392 |
| 594. Bias towards other trust jurisdictions                                          | 393 |
| 595. Legal uncertainty and sub-optimal judicial powers                               | 394 |
| 596. Vulnerability of non-resident trustees to removal                               | 394 |
| <b>(d) Trust corporations</b>                                                        | 395 |
| 597. Notion and special position of trust corporations                               | 395 |
| 598. Qualification as a trust corporation                                            | 395 |
| <b>(e) Restricted powers of investment</b>                                           | 396 |
| 599. Power to acquire land: England and Wales                                        | 396 |
| 600. Northern Ireland, Scotland, Republic of Ireland                                 | 397 |
| 601. Summary                                                                         | 397 |
| <b>(7.) Conclusion</b>                                                               | 398 |
| 602. Interaction of trust law and contract                                           | 398 |
| 603. Trust law obstacles to competition and full exploitation of the internal market | 398 |

## Part Three:

## Issues Common to Parts One and Two

|                                                                              |     |
|------------------------------------------------------------------------------|-----|
| <b>I. Electronic Communication</b>                                           | 399 |
| <b>(1.) Introduction</b>                                                     | 399 |
| 604. IT law                                                                  | 399 |
| 605. Terminology and approach                                                | 399 |
| 606. Contract law                                                            | 399 |
| 607. Property law                                                            | 400 |
| 608. Tort law                                                                | 400 |
| 609. Legislative technique                                                   | 400 |
| 610. Need for harmonisation                                                  | 400 |
| <b>(2.) Specifically on the Consequence of Harmonising Contract Law Only</b> | 400 |
| 611. UNCITRAL                                                                | 400 |
| 612. EU legislation                                                          | 401 |
| 613. PECL and SGECC                                                          | 401 |
| 614. Ditto                                                                   | 402 |
| 615. A different approach in existing EC Directives                          | 402 |
| <b>(3.) Contract Law and its Relation to Property Law</b>                    | 403 |
| 616. Substance and structure                                                 | 403 |
| 617. Transferable records                                                    | 403 |
| 618. Synchronisation of terminology                                          | 403 |

|                                                                                                    |            |
|----------------------------------------------------------------------------------------------------|------------|
| 619. Notices                                                                                       | 404        |
| 620. Conclusion                                                                                    | 404        |
| <b>(4.) Contract Law and its Relation to Tort Law</b>                                              | <b>404</b> |
| 621. Structure                                                                                     | 404        |
| 622. Substance                                                                                     | 405        |
| 623. Provider's liability                                                                          | 405        |
| <b>(5.) Conclusion</b>                                                                             | <b>406</b> |
| 624. Harmonisation of contract law not sufficient                                                  | 406        |
| <b>II. L'Opposabilité des Contrats aux Tiers et par les Tiers</b>                                  | <b>406</b> |
| <b>(1.) Introduction</b>                                                                           | <b>406</b> |
| 625. Le concept d'opposabilité                                                                     | 406        |
| 626. L'article 1165 du Code civil et l'origine doctrinale du principe d'opposabilité               | 406        |
| 627. L'accueil de la théorie par le droit positif                                                  | 407        |
| 628. Le fondement discuté de l'opposabilité                                                        | 408        |
| 629. Plan                                                                                          | 409        |
| <b>(2.) L'Opposabilité des Effets Translatifs ou Constitutifs de Droits Réels</b>                  | <b>409</b> |
| 630. La portée du principe en droit français                                                       | 409        |
| 631. La règle du transfert solo consensu des droits et l'opposabilité de ce transfert              | 409        |
| 632. Opposabilité du transfert                                                                     | 410        |
| 633. Protection des tiers                                                                          | 410        |
| 634. L'incidence des règles de publicité                                                           | 410        |
| 635. Droits réels immobiliers                                                                      | 411        |
| 636. Meubles incorporels et meubles corporels immatriculés                                         | 411        |
| 637. Meubles corporels                                                                             | 412        |
| 638. Gage                                                                                          | 412        |
| 639. Propriété-sûreté                                                                              | 412        |
| 640. Sûretés sui generis?                                                                          | 413        |
| 641. L'application du principe dans les opérations transfrontalières                               | 413        |
| 642. Publicité foncière                                                                            | 414        |
| 643. Les transactions immobilières                                                                 | 414        |
| 644. L'inefficacité fréquente, en France, des sûretés mobilières de droit étranger                 | 415        |
| 645. La Directive 2000/35/EC                                                                       | 415        |
| 646. Les arrêts DIAC et Fristol                                                                    | 416        |
| <b>(3.) La Responsabilité des Tiers qui Portent Atteinte aux Droits Nés du Contrat</b>             | <b>416</b> |
| 647. Le principe de la responsabilité du tiers qui porte sciemment atteinte à un droit contractuel | 416        |
| 648. Élément matériel                                                                              | 417        |
| 649. Élément moral                                                                                 | 418        |
| 650. Réparation                                                                                    | 418        |
| 651. Autres aspects de l'opposabilité aux tiers en matière de responsabilité délictuelle           | 419        |
| 652. La portée du principe dans les opération transfrontalières                                    | 420        |

|                                                                                                              |            |
|--------------------------------------------------------------------------------------------------------------|------------|
| 653. Principes divergents dans d'autres droits européens: l'exemple du droit allemand                        | 421        |
| 654. Enjeux pratiques: l'exemple des réseaux de distribution                                                 | 421        |
| <b>(4.) La Responsabilité des Parties envers les Tiers</b>                                                   | <b>422</b> |
| 655. La portée du principe de l'assimilation des fautes contractuelles et délictuelle en droit français      | 422        |
| 656. Les fautes délictuelles à l'égard des tiers commises dans l'exécution d'un contrat                      | 423        |
| 657. L'assimilation des fautes contractuelle et délictuelle                                                  | 423        |
| 658. Incidence du principe du non-cumul                                                                      | 424        |
| 659. Portée des actions directes nécessairement contractuelles                                               | 424        |
| 660. La portée du principe dans les opérations transfrontalières                                             | 425        |
| 661. Les actions directes                                                                                    | 425        |
| 662. Autres aspects de l'opposabilité et détermination de la nature contractuelle ou délictuelle de l'action | 426        |
| 663. Les conséquences délictuelles de l'inexécution d'un contrat                                             | 426        |
| 664. Les distorsions de concurrence pouvant résulter des divergences de législation                          | 427        |
| <b>III. Information about Foreign Law</b>                                                                    | <b>428</b> |
| 665. An illustration from Austria                                                                            | 428        |

## Part Four:

**Information from Legal and Business Practice**

|                                                                                              |     |
|----------------------------------------------------------------------------------------------|-----|
| 666. General                                                                                 | 431 |
| 667. First questionnaire round: letters to business organisations                            | 431 |
| 668. Appendix                                                                                | 433 |
| 669. Summary of responses                                                                    | 435 |
| 670. Qn 1 (abstaining from business due to inestimable risks)                                | 436 |
| 671. Qn 2 (auditing of particular risks of liability)                                        | 436 |
| 672. Qn 3 (protection of confidential information)                                           | 437 |
| 673. Qn 4 (incorrect information)                                                            | 438 |
| 674. Qn 5 (choice of law)                                                                    | 438 |
| 675. Qn 6 (non-excludable comparative competitive disadvantages)                             | 438 |
| 676. Qn 7 (adjustment of contract terms to differences in applicable contract and tort laws) | 439 |
| 677. Qn 8 (action and costs in ascertaining private law of another member state)             | 439 |
| 678. Qn 9 (problems due to differences in rules on acquisition and ownership of movables)    | 439 |
| 679. Qn 10 (different modes and costs in securing cross-border credit)                       | 440 |
| 680. Qn 11 (comparative costs of credit in countries where creditor not located)             | 440 |
| 681. Qn 12 (unsuitability of domestic modes of security)                                     | 441 |
| 682. Qn 13 (restrictions of trade due to differences in reservation of title rules)          | 441 |
| 683. Qn 14 (costs in pursuing claims against contract parties in another Member State)       | 441 |
| 684. First questionnaire round: letters to consumer organisations                            | 441 |
| 685. Summary of responses                                                                    | 443 |

|                                                                                                         |     |
|---------------------------------------------------------------------------------------------------------|-----|
| 686. Qn 1 (consumers abstaining from transactions due to uncertainty as to rights or their enforcement) | 443 |
| 687. Qn 2 (ability of organisation to assist consumers)                                                 | 443 |
| 688. Qn 3 (comparative disadvantage for consumers in cross-border supplies)                             | 443 |
| 689. Qn 4 (problems connected to electronic commerce)                                                   | 444 |
| 690. Qn 5 (actual or anticipated internet-related problems)                                             | 444 |
| 691. Qn 6 (misuse of personal data and other confidential information)                                  | 444 |
| 692. Qn 7 (incorrect information)                                                                       | 444 |
| 693. Qn 8 (choice of law agreements to detriment of consumer)                                           | 444 |
| 694. Qn 9 (legal provisions inducing consumers to opt for foreign suppliers)                            | 444 |
| 695. Qn 10 (adjustment of contract terms to differences in applicable contract and tort laws)           | 444 |
| 696. Qn 11 (action and costs in ascertaining private law of another member state)                       | 444 |
| 697. Qn 12 (difficulty, costs, familiarity and risks of borrowing and security abroad)                  | 445 |
| 698. Qn 13 (problems of advance payment and non-delivery)                                               | 445 |
| 699. Qn 14 (costs in pursuing claims against businesses in another member state)                        | 445 |
| 700. Second questionnaire round: letters to business and consumer organisations                         | 445 |
| 701. Note of thanks to the authors of the responses                                                     | 452 |

Part Five:

**Analysis and Recommendations**

|                                                                                                                                     |     |
|-------------------------------------------------------------------------------------------------------------------------------------|-----|
| <b>I. Tort Law and Contract Law</b>                                                                                                 | 457 |
| 702. Impediments to the proper functioning of the internal market                                                                   | 457 |
| 703. Interference                                                                                                                   | 457 |
| 704. The problem of interference must be considered from the standpoint of every legal system – even a future possible European one | 457 |
| 705. The interference problem in a narrow sense: the problem of complexity                                                          | 458 |
| 706. Obstacles to the internal market                                                                                               | 458 |
| 707. Distortions of competition                                                                                                     | 458 |
| 708. Responses of consultees                                                                                                        | 459 |
| 709. Analysis of various legal rules                                                                                                | 459 |
| 710. Differences between tort and contract law                                                                                      | 460 |
| 711. Conceptual differences                                                                                                         | 460 |
| 712. The common frame of reference: recommendations                                                                                 | 460 |
| 713. Contract law and law of obligations                                                                                            | 461 |
| 714. The interference problem in a broader sense                                                                                    | 461 |
| 715. Obstacles to the providers of goods or services                                                                                | 461 |
| 716. Summary of the interferences of greatest importance for the internal market                                                    | 462 |
| 717. Ditto                                                                                                                          | 462 |
| 718. Ditto                                                                                                                          | 463 |
| 719. Ditto                                                                                                                          | 463 |
| 720. Ditto                                                                                                                          | 464 |
| 721. Ditto                                                                                                                          | 464 |
| 722. Ditto                                                                                                                          | 465 |

|                                                                        |            |
|------------------------------------------------------------------------|------------|
| 723. Ditto                                                             | 465        |
| 724. Ditto                                                             | 465        |
| 725. Ditto                                                             | 466        |
| 726. Ditto                                                             | 466        |
| 727. Ditto                                                             | 466        |
| 728. Ditto                                                             | 466        |
| 729. Ditto                                                             | 466        |
| <br>                                                                   |            |
| <b>II. Property Law and Contract Law</b>                               | <b>467</b> |
| 730. The relevant issue                                                | 467        |
| 731. Mutual interferences of contract law and property law             | 467        |
| 732. Remedying interferences of contract law with property law         | 467        |
| 733. Other obstacles to a free flow of commerce in the internal market | 468        |
| 734. Possible remedies: private international law                      | 468        |
| 735. Continued: a grace period                                         | 468        |
| 736. Harmonization of security laws in steps                           | 469        |
| <br>                                                                   |            |
| <b>Annexes</b>                                                         |            |
| <br>                                                                   |            |
| Table of Abbreviations                                                 | 471        |
| <br>                                                                   |            |
| Table of Codes, Statutes and other Legislation                         | 485        |
| <br>                                                                   |            |
| Table of Cases from English Speaking Jurisdictions                     | 515        |
| <br>                                                                   |            |
| Table of Literature                                                    | 525        |
